# Supplementary material for: HIV-1 tropism prediction by the XGboost and HMM methods
Source: PubMed Central journal article supplement (PMC6620319; doi:10.1038/s41598-019-46420-4), 2019-07-10
Supplement: 41598_2019_46420_MOESM1_ESM.pdf [file 41598_2019_46420_MOESM1_ESM.pdf]

# **HIV-1 tropism prediction by the XGboost and HMM methods**

**Xiang Chen<sup>1</sup>, Zhi-Xin Wang<sup>1</sup>, Xian-Ming Pan<sup>\*</sup>**

<sup>1</sup>Key Laboratory of Ministry of Education for Protein Science, School of Life Sciences,  
Tsinghua University, Beijing 100084, China.

<sup>\*</sup>Correspondence to Xian-Ming Pan, Key Laboratory of Bioinformatics, Ministry of  
Education, School of Life Sciences, Tsinghua University, Beijing 100084, China.

Tel: +86-10-62792827; Fax: +86-10-62792827

E-mail: [pan-xm@mail.tsinghua.edu.cn](mailto:pan-xm@mail.tsinghua.edu.cn)

---

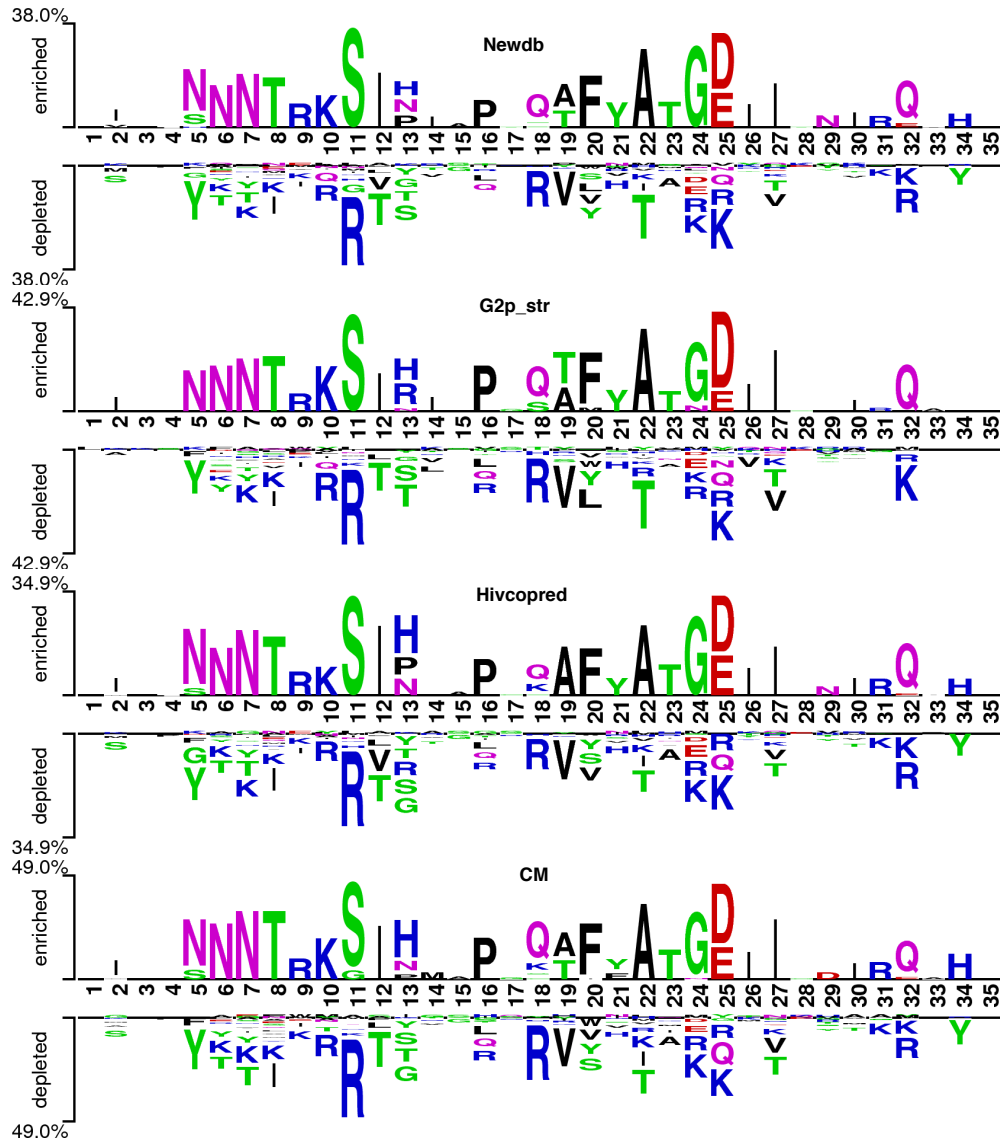

Figure S1. Two sample logos for R5 and X4-using tropic sequences.

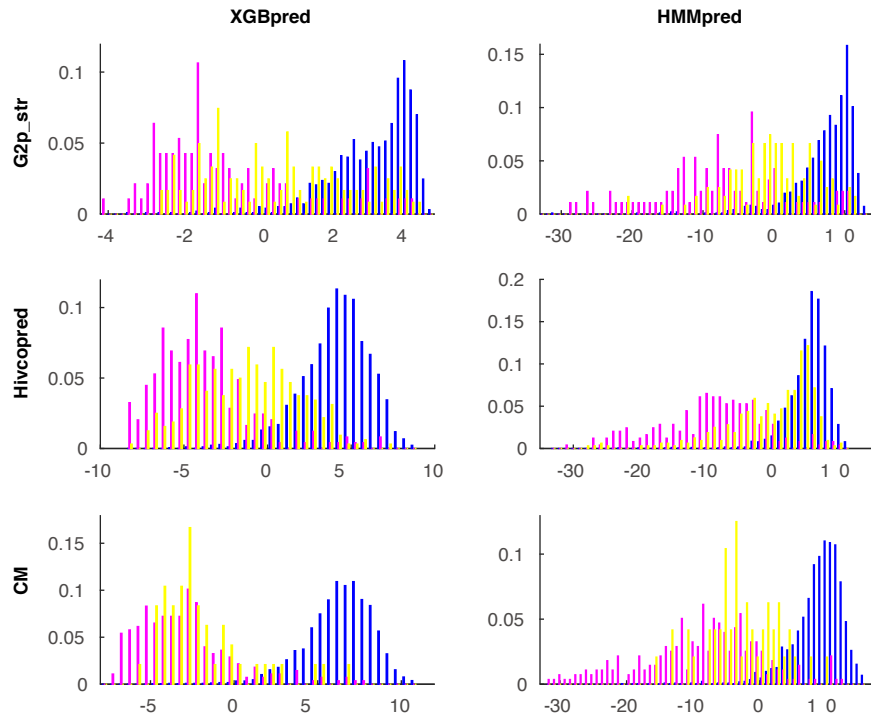

**Figure S2. Distribution of V3 loop sequence scores calculated from the XGBpred and HMMpred methods on the G2p\_str, Hivcopred and CM datasets. The score distribution of the R5 tropic sequences is shown in blue, that of X4 is carmine and that of dual is yellow.**

---

**Table S1. Construction of the HMMpred method.** Performances of the HMMpred method based on different HMM models on the Newdb dataset in a same 10-fold cross validation test (threshold = 1.0). Notes: <sup>a</sup>The full HMM model: transition allowed from  $D_j$  to  $I_j$  or from  $I_j$  to  $D_{j+1}$ . <sup>b</sup>The MSA generated by EMBOSS was manually adjusted to 35 match states. <sup>c</sup>No emission allowed in insertion states. <sup>d</sup>The HMMER model: no transition allowed from  $D_j$  to  $I_j$  or from  $I_j$  to  $D_{j+1}$ . <sup>e</sup>Regardless of background frequencies. <sup>\*</sup>The final HMM model used in this study.

| Model                           | Sensitivity | Specificity | Accuracy | MCC    | AUC    |
|---------------------------------|-------------|-------------|----------|--------|--------|
| <b>Full<sup>a</sup></b>         | 92.76%      | 67.57%      | 87.19%   | 0.6194 | 0.8659 |
| <b>Full_MSA<sup>ab</sup></b>    | 92.42%      | 67.87%      | 86.99%   | 0.6153 | 0.8669 |
| <b>I_emission<sup>abc</sup></b> | 92.21%      | 66.21%      | 86.46%   | 0.5983 | 0.8628 |
| <b>HMMER<sup>bd</sup></b>       | 91.18%      | 69.38%      | 86.36%   | 0.6046 | 0.8686 |
| <b>No_back1<sup>abe</sup></b>   | 92.89%      | 69.08%      | 87.63%   | 0.6335 | 0.8764 |
| <b>No_back2<sup>bde*</sup></b>  | 92.03%      | 70.29%      | 87.22%   | 0.6270 | 0.8774 |

**Table S2. Construction of the XGBpred method.** Performances of the XGBpred method based on different and combination of feature sets on the Newdb dataset in a same 10-fold cross validation test at the sensitivity of 91.78%. Notes: <sup>a</sup>20-dimensional amino acid composition feature set. <sup>b</sup>Split amino acid composition feature sets: <sup>b1</sup>40-d split amino acid composition; and <sup>b2</sup>combining with 1-d full net charge; and <sup>b3</sup>combining with 6-d full and split net charges and hydropath; <sup>b4</sup>60-d split amino acid composition. <sup>c</sup>35-d alignment score feature sets: using blocks substitution matrix <sup>c1</sup>BLOSUM62, <sup>c2</sup>BLOSUM90 or <sup>c3</sup>BLOSUM100, respectively. <sup>bc</sup>Combinational feature sets of 40-d

split amino acid composition and 35-d alignment score features. <sup>ac</sup>Combinational feature sets of 20-d amino acid composition and 35-d alignment score features. <sup>d</sup>400-d dipeptide composition feature set. <sup>dc</sup>Combinational feature sets of 400-d dipeptide composition and 35-d alignment score features. \*The final feature set used in the XGBpred method.

| Features                            | Specificity   | Accuracy      | MCC           | AUC           |
|-------------------------------------|---------------|---------------|---------------|---------------|
| <b>20d<sup>a</sup></b>              | 76.02%        | 88.29%        | 0.6664        | 0.9151        |
| <b>40d<sup>b1</sup></b>             | 80.84%        | 89.36%        | 0.7029        | 0.9256        |
| <b>40d1d<sup>b1</sup></b>           | 82.50%        | 89.69%        | 0.7146        | 0.9267        |
| <b>40d2d<sup>b2</sup></b>           | 82.35%        | 89.69%        | 0.7142        | 0.9250        |
| <b>40d6d<sup>b3</sup></b>           | 79.79%        | 89.13%        | 0.6950        | 0.9180        |
| <b>60d<sup>b4</sup></b>             | 82.20%        | 89.66%        | 0.7131        | 0.9324        |
| <b>35d (B62)<sup>c1</sup></b>       | 83.56%        | 89.96%        | 0.7232        | 0.9324        |
| <b>35d (B90)<sup>c2</sup></b>       | 82.35%        | 89.69%        | 0.7142        | 0.9339        |
| <b>35d (B100)<sup>c3</sup></b>      | 84.01%        | 90.06%        | 0.7266        | 0.9386        |
| <b>40d35d (B100)<sup>bc</sup></b>   | 84.62%        | 90.19%        | 0.7310        | 0.9413        |
| <b>40d35d (B90)<sup>bc</sup></b>    | 83.56%        | 89.96%        | 0.7232        | 0.9371        |
| <b>20d35d (B100)<sup>ac</sup></b>   | 83.86%        | 90.03%        | 0.7254        | 0.9370        |
| <b>400d<sup>d</sup></b>             | 82.96%        | 89.83%        | 0.7187        | 0.9432        |
| <b>400d35d (B100)<sup>dc*</sup></b> | <b>84.62%</b> | <b>90.19%</b> | <b>0.7310</b> | <b>0.9465</b> |

**Table S3. Performance of the 11/25 and 11/25/5 rules on different datasets.**

| Dataset          | Rule    | Sensitivity | Specificity | Accuracy | MCC    |
|------------------|---------|-------------|-------------|----------|--------|
| <b>Newdb</b>     | 11/25   | 94.90%      | 50.53%      | 85.09%   | 0.5260 |
|                  | 11/25/5 | 93.79%      | 57.92%      | 85.86%   | 0.5630 |
| <b>G2p_str</b>   | 11/25   | 94.86%      | 54.42%      | 87.54%   | 0.5459 |
|                  | 11/25/5 | 93.83%      | 59.53%      | 87.63%   | 0.5630 |
| <b>Hivcopred</b> | 11/25   | 95.26%      | 47.80%      | 83.81%   | 0.5166 |
|                  | 11/25/5 | 94.40%      | 54.14%      | 84.63%   | 0.5492 |
| <b>cm</b>        | 11/25   | 95.03%      | 61.23%      | 90.93%   | 0.5695 |
|                  | 11/25/5 | 93.84%      | 72.00%      | 91.19%   | 0.6168 |

**Table S4. Performance of stacking based meta methods.** Performance of stacking based XGBpred methods in a same 10-fold cross validation test at the sensitivity of 91.78%, 93.73%, 88.97% and 95.54% on the Newdb, G2p\_str, Hivcopred and CM datasets, respectively. Notes: <sup>a</sup>3-d XGBpred, Hivcopred and HMMpred score feature set. <sup>b</sup>Combinational feature sets of 400-d dipeptide composition, 35-d alignment score features, and 2-d Hivcopred and HMMpred score features. <sup>c</sup>Combinational feature sets of 400-d dipeptide composition, 35-d alignment score features, and 1-d Hivcopred score features (considering the poor performance of HMMpred).

| Dataset          | Method              | Specificity | Accuracy | MCC    | AUC    |
|------------------|---------------------|-------------|----------|--------|--------|
| <b>Newdb</b>     | 3d <sup>a</sup>     | 84.62%      | 90.19%   | 0.7310 | 0.9453 |
|                  | 435d2d <sup>b</sup> | 84.31%      | 90.13%   | 0.7288 | 0.9362 |
|                  | 435d1d <sup>c</sup> | 83.56%      | 89.96%   | 0.7232 | 0.9326 |
| <b>G2p_str</b>   | 3d                  | 73.49%      | 90.07%   | 0.6674 | 0.8978 |
|                  | 435d2d              | 73.02%      | 89.98%   | 0.6640 | 0.8993 |
|                  | 435d1d              | 72.09%      | 89.81%   | 0.6570 | 0.9040 |
| <b>Hivcopred</b> | 3d                  | 89.07%      | 88.99%   | 0.7303 | 0.9467 |
|                  | 435d2d              | 85.54%      | 88.14%   | 0.7032 | 0.9409 |
|                  | 435d1d              | 86.60%      | 88.39%   | 0.7114 | 0.9392 |
| <b>CM</b>        | 3d                  | 95.08%      | 95.48%   | 0.8185 | 0.9778 |
|                  | 435d2d              | 94.77%      | 95.45%   | 0.8165 | 0.9782 |
|                  | 435d1d              | 94.15%      | 95.37%   | 0.8126 | 0.9797 |

**Table S5. Dependence of results generated by XGBpred, Hivcopred and HMMpred.** Pearson correlation analysis and statistical hypothesis test (two-tailed t-test by SPSS) for samples predicted wrongly by the XGBpred method.

| Dataset          | Methods   | XGBpred             |         |
|------------------|-----------|---------------------|---------|
|                  |           | Pearson correlation | P value |
| <b>Newdb</b>     | Hivcopred | 0.578               | <0.01   |
|                  | HMMpred   | 0.506               | <0.01   |
| <b>G2p_str</b>   | Hivcopred | 0.657               | <0.01   |
|                  | HMMpred   | 0.741               | <0.01   |
| <b>Hivcopred</b> | Hivcopred | 0.578               | <0.01   |
|                  | HMMpred   | 0.488               | <0.01   |
| <b>CM</b>        | Hivcopred | 0.642               | <0.01   |
|                  | HMMpred   | 0.516               | <0.01   |
